# Supplementary material
Source: Springer Nature journal article supplement (https://www.springermedizin.de/resource/supplementary/12883_2012_753_MOESM7_ESM.pdf/9456198)
Supplement: MOESM7 [file 9456198]

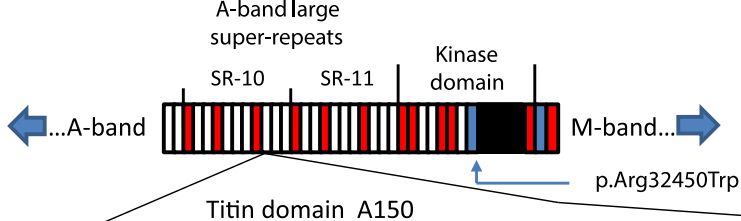

|              |                                                                                                                        |
|--------------|------------------------------------------------------------------------------------------------------------------------|
| Human        | DSPG <b>P</b> CGKLTVSRVTQEKCTLAWSLPQEDGGAEITHYIVERRETSRLNWWVIVEGECPTLSYVVTRLIKNNEYIFRVRAVNKYGP <b>G</b> VPVESEPIVARNST |
| Rhesus       | DSPG <b>P</b> CGKLTVSRVTEEKCTLAWSLPQEDGGAEITHYIVERRETSRLNWWVIVEGECPTLSYVVTRLIKNNEYIFRVRAVNKYGP <b>G</b> VPVESEPIVARNST |
| Mouse        | DSPG <b>P</b> CGKLTVSRVTEEKCTLAWSLPQEDGGAEITHYIVERRETSRLNWWVIVEGECITASYVVTRLIKNNEYTFRVRAVNKYGP <b>G</b> VPVESEPIVARNST |
| Dog          | DSPG <b>P</b> CGKLTVSRITEEKCTLAWSLPQEDGGAEITHYIVERRETSRLNWWVIVEAECPTLSCVTRLIKNNEYIFRVRAVNKYGP <b>G</b> VPVESEPIVARNST  |
| Elephant     | DSPG <b>P</b> CGKLTVSRVTEEKCTLAWSLPQEDGGAEITHYIVERRETSRLNWWIVEDECPTLSCVTRMIKNNEYVFRVKAVNKY <b>G</b> PGVPIESEPIVARNST   |
| Opossum      | DSPG <b>P</b> CGNLTISRVTEEKCTLAWTLPKEDGGAEITHYIVERRETSRLNWWIVEGECPTLSCVTRLIKNNEYIFRVRAVNKYGP <b>G</b> VPVESGPIIARNST   |
| Chicken      | DSPG <b>P</b> CGKITVSRITEEKCTLAWNIPEDGGAQITHYIVERRETSRLHWVIVEAECQTLSCVTKLIKNNEYIFRVRGVNKYGP <b>G</b> VPLETEPIIARNAFT   |
| X.Tropicalis | DTPG <b>P</b> CDKITISRITEEKCTLSWKLPQEDGGAAISHYIVERRETSRLNVAI VDPECPTLSCNVTRLIKNNEYIFRLRAVNKYGP <b>G</b> VPLESEPIVARNST |
| Zebrafish    | DTPG <b>P</b> GTITISRVTDEKCTVSWKIPLDGGDHVSHYIVERRETSRLNWWIMETECKTLSCVSTKLIKNNNEYIFRVRGVNKYGP <b>G</b> VPLESEAIARNAYT   |

p.Cys30071Arg

p.Gly30150Asp
